# Supplementary material for: Tailoring structural features and functions of fullerene rod crystals by a ferrocene-modified fullerene derivative
Source: Royal Society of Chemistry journal article supplement (doi:10.1039/d0ce01019g), 2020-01-01
Supplement: d0ce01019g1.pdf [file d0ce01019g1.pdf]

## Supporting Information

### **Tailoring Structural Features and Functions of Fullerene Rod Crystals by Ferrocene-Modified Fullerene Derivative**

*Bohong Jiang,<sup>a#</sup> Qin Tang,<sup>a#</sup> Wenli Zhao,<sup>a</sup> Jiao Sun,<sup>a</sup> Rong An,<sup>a</sup> Tianchao Niu,<sup>a</sup> Harald Fuchs,<sup>a,b</sup> Qingmin Ji<sup>\*a</sup>*

<sup>a</sup>*Herbert Gleiter Institute of Nanoscience, Nanjing University of Science & Technology,  
200 Xiaolingwei, Nanjing 210094, China.*

<sup>b</sup>*Center for Nanotechnology, University of Münster, Wilhelm Klemm-Str. 10, D-48149  
Münster, Germany.*

<sup>#</sup>*J.B. and Q.T. contributed equally to this work*

Corresponding Author\*: [jqingmin@njust.edu.cn](mailto:jqingmin@njust.edu.cn)

## Additional Data

**Table S1.** The structural features of different fullerene superstructures.

|                                      | Lengths( $\mu\text{m}$ ) | Diameters( $\mu\text{m}$ ) |
|--------------------------------------|--------------------------|----------------------------|
| $\text{C}_{60}$ -2IPA                | 22.5                     | 1                          |
| $\text{C}_{60}$ -4IPA                | 10                       | 1                          |
| $\text{C}_{60}$ -8IPA                | 7                        | 1                          |
| $\text{C}_{60}\text{FcC}_{60}$ -2IPA | 5                        | 2                          |
| $\text{C}_{60}\text{FcC}_{60}$ -4IPA | 3.8                      | 1                          |
| $\text{C}_{60}\text{FcC}_{60}$ -8IPA | 3.4                      | 1.5                        |

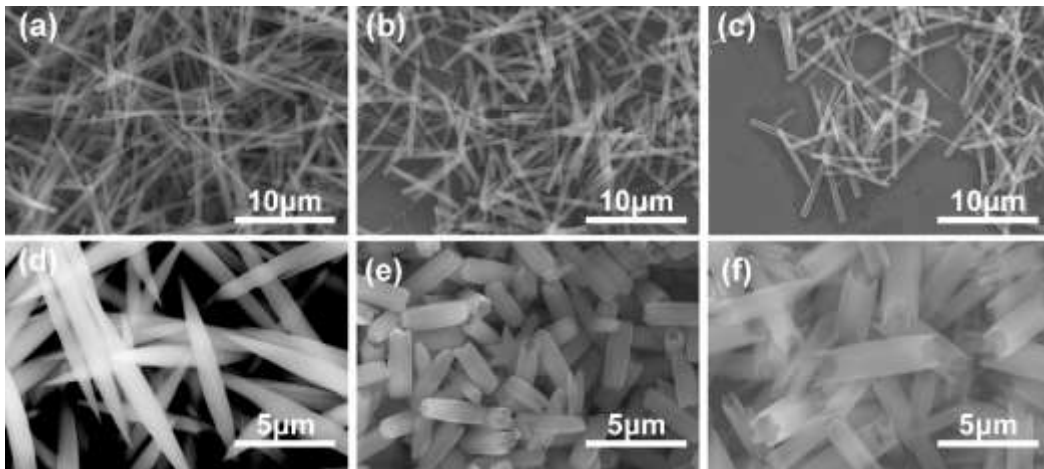

**Figure S1.** SEM images for  $C_{60}$  fullerene superstructures without  $FcC_{60}$  of (a)  $C_{60}$ -2IPA (nanowhiskers), (b)  $C_{60}$ -4IPA (nanowhiskers), (c)  $C_{60}$ -8IPA (nanowhiskers); and  $C_{60}$  fullerene superstructures with  $FcC_{60}$  ( $C_{60}FcC_{60}$ ) of (d)  $C_{60}FcC_{60}$ -2IPA (spindle-like microrods), (e)  $C_{60}FcC_{60}$ -4IPA (short tubular microrods), (f)  $C_{60}FcC_{60}$ -8IPA (microrods with flower-like edge).

**Table S2.** The structures obtained via LLIP process with different mixing ratios of  $\text{FcC}_{60}$  and  $\text{C}_{60}$ .

| <b>0 : 1</b>                                                                        | <b>0.15 : 9.85</b>                                                                   |
|-------------------------------------------------------------------------------------|--------------------------------------------------------------------------------------|
| 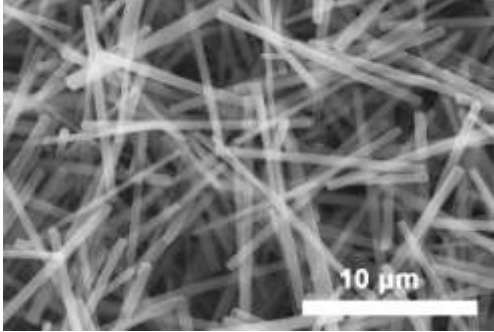   |    |
| <b>0.3 : 9.7</b>                                                                    | <b>0.6 : 9.4</b>                                                                     |
|   |   |
| <b>1.2 : 8.8</b>                                                                    | <b>2.4 : 7.6</b>                                                                     |
|  |  |

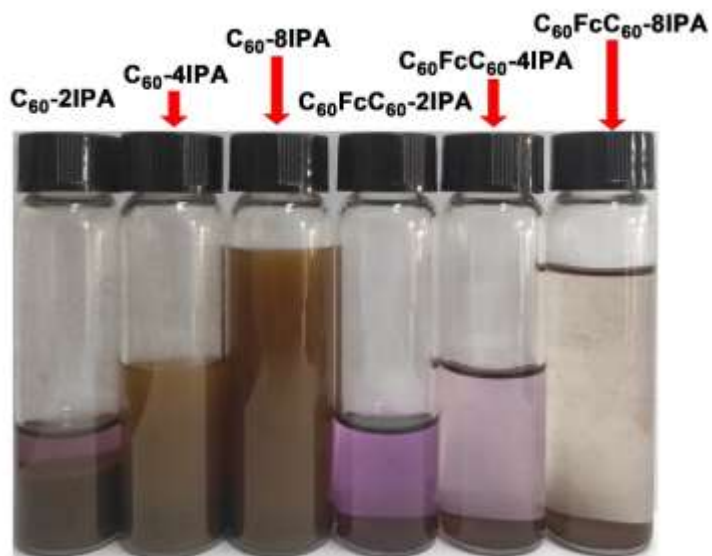

**Figure S2.** The dispersion appearances of fullerene superstructures by the LLIP process.

There are less assembled structures formed and more un-assembled fullerene left in the cases of  $C_{60}$ - $FcC_{60}$  mixture system.

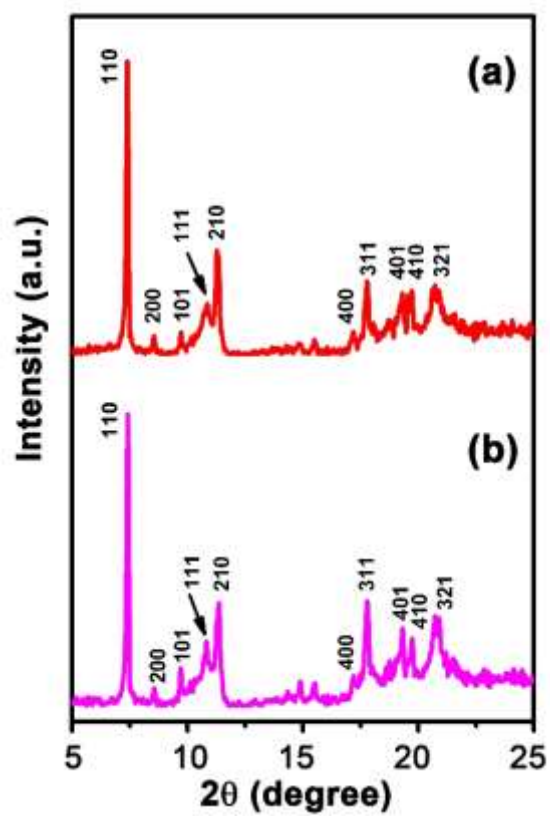

Figure S3. XRD pattern of (a)  $C_{60}FcC_{60}$ -8IPA, (b)  $C_{60}FcC_{60}$ -4IPA.

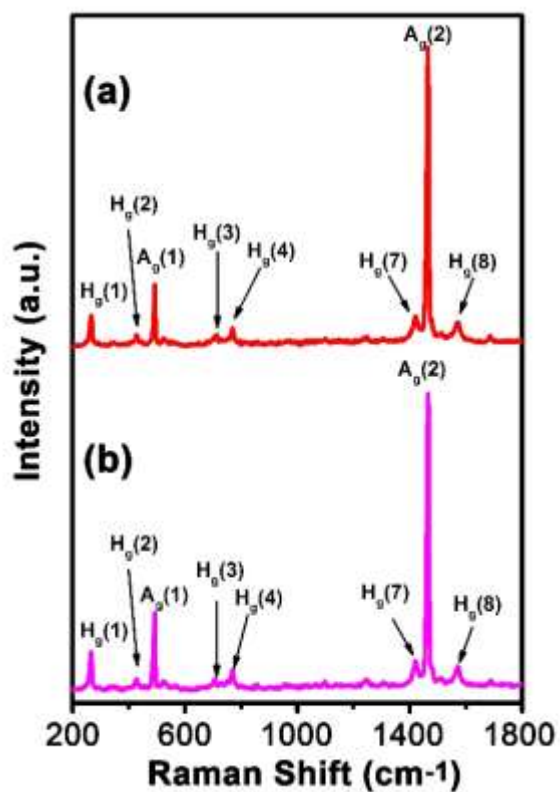

**Figure S4.** Raman spectra of (a)  $C_{60}FcC_{60}$ -8IPA and (b)  $C_{60}FcC_{60}$ -4IPA.

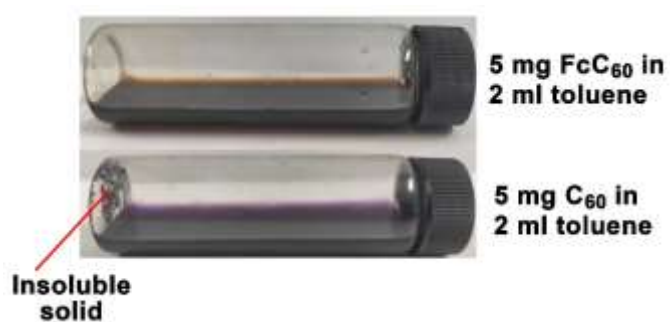

**Figure S5.** The solubility comparison of  $C_{60}$  and  $FcC_{60}$ . At the same amount (5 mg) in toluene (2 mL),  $C_{60}$ s can not be completely dissolved, while  $FcC_{60}$ s are all dissolved.

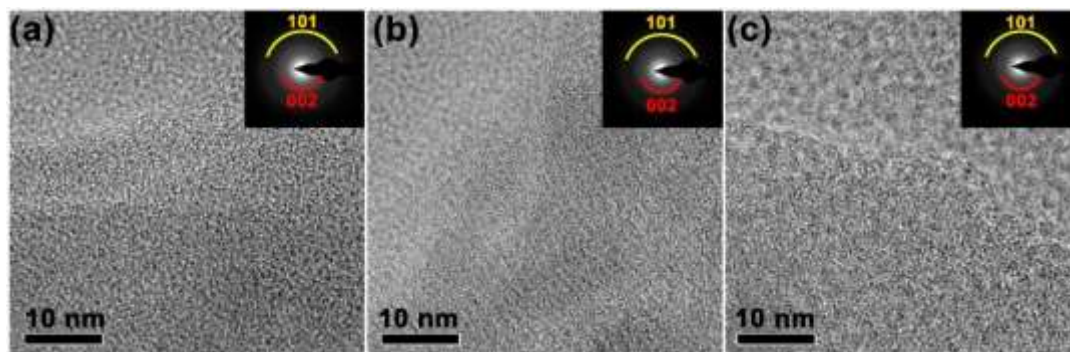

**Figure S6.** HRTEM images of (g) C<sub>60</sub>FcC<sub>60</sub>-2IPA\_900, (h) C<sub>60</sub>FcC<sub>60</sub>-4IPA\_900, (i) C<sub>60</sub>FcC<sub>60</sub>-8IPA\_900 and inset of panels shows SAED pattern of C<sub>60</sub>FcC<sub>60</sub>-2IPA\_900, C<sub>60</sub>FcC<sub>60</sub>-4IPA\_900 and C<sub>60</sub>FcC<sub>60</sub>-8IPA\_900, respectively.

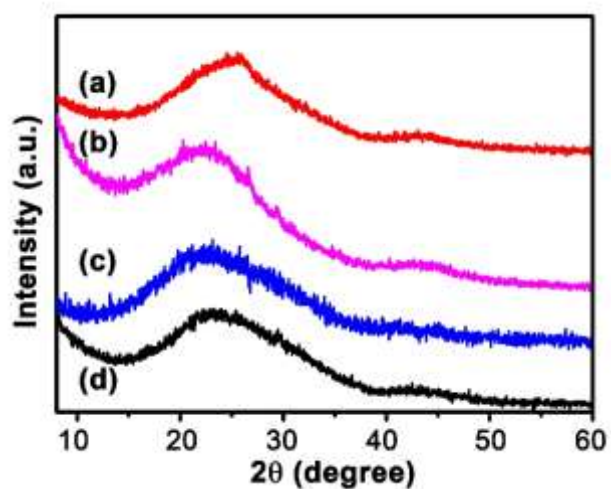

**Figure S7.** XRD spectra of (a) C<sub>60</sub>FcC<sub>60</sub>-8IPA, (b) C<sub>60</sub>FcC<sub>60</sub>-4IPA\_900, (c) C<sub>60</sub>FcC<sub>60</sub>-2IPA\_900 and (d) C<sub>60</sub>-2IPA\_900.



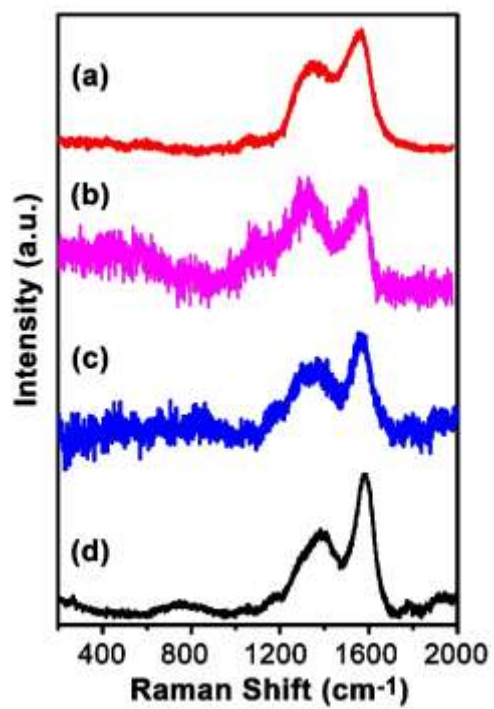

**Figure S8.** Raman spectra of (a)  $C_{60}FcC_{60}$ -8IPA, (b)  $C_{60}FcC_{60}$ -4IPA\_900, (c)  $C_{60}FcC_{60}$ -2IPA\_900 and (d)  $C_{60}$ -2IPA\_900.

**Table S3.** The porous characters of carbon materials from C<sub>60</sub> nanowhiskers and various C<sub>60</sub>FcC<sub>60</sub> microrods.

|                                             | BET surface area<br>(m <sup>2</sup> /g) | Average<br>Pore size (nm) | Pore volume<br>(cm <sup>3</sup> /g) |
|---------------------------------------------|-----------------------------------------|---------------------------|-------------------------------------|
| C <sub>60</sub> -2IPA_900                   | 295                                     | 2.32                      | 0.059                               |
| C <sub>60</sub> FcC <sub>60</sub> -2IPA_900 | 491                                     | 3.86                      | 0.10                                |
| C <sub>60</sub> FcC <sub>60</sub> -4IPA_900 | 493                                     | 3.86                      | 0.10                                |
| C <sub>60</sub> FcC <sub>60</sub> -8IPA_900 | 613                                     | 3.86                      | 0.11                                |

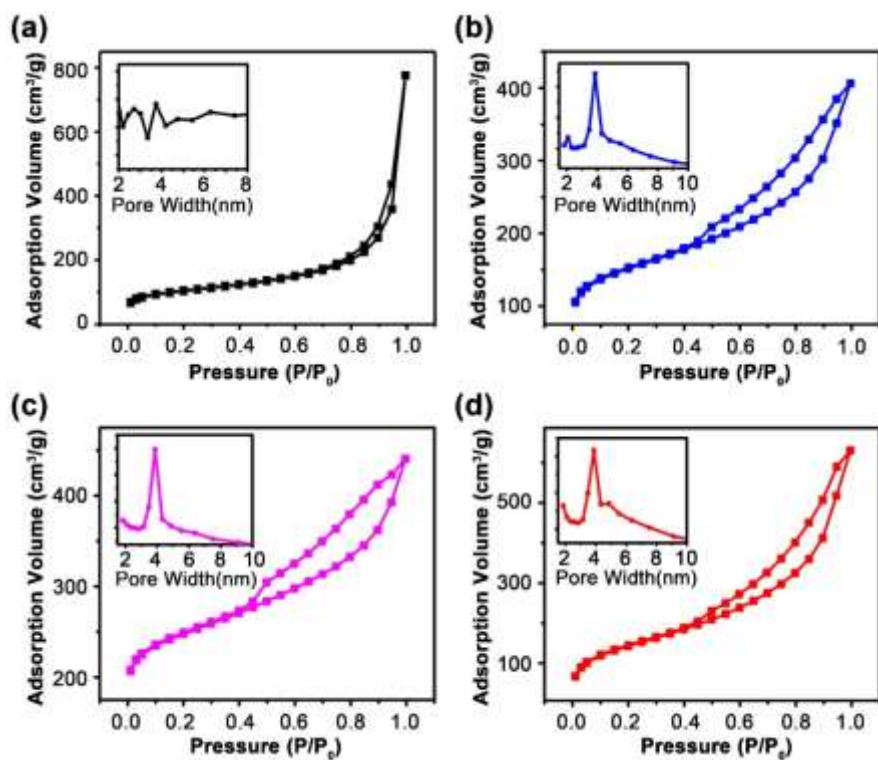

**Figure S9.** Nitrogen isotherms and pore size distributions (inset) of the porous carbons.

(a)  $C_{60}$ -2IPA\_900, (b)  $C_{60}FcC_{60}$ -2IPA\_900 (c)  $C_{60}FcC_{60}$ -4IPA\_900, (d)  $C_{60}FcC_{60}$ -8IPA\_900.

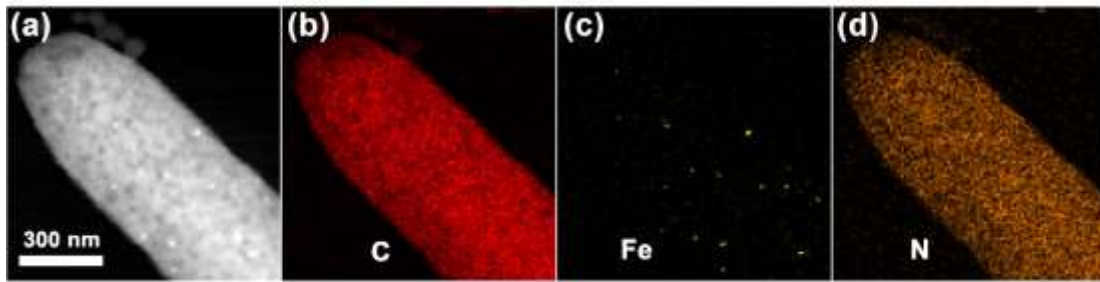

**Figure S10.** (a) STEM image of the porous carbons from  $C_{60}FcC_{60}$  microrods and the elemental mapping of (a) for the (b) C, (c) Fe and N in the microrod.

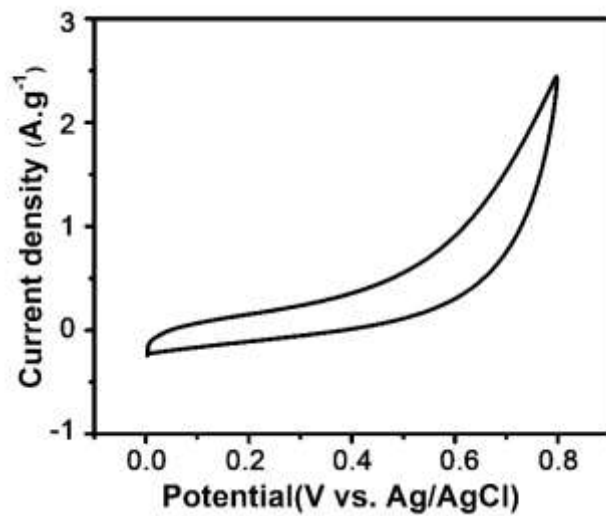

**Figure S11.** CV curve of the porous carbon from pure  $C_{60}$ s ( $C_{60}$  nanowhiskers) at a scan rate of  $10 \text{ mV} \cdot \text{s}^{-1}$ .

**Table S4.** The comparison of the supercapacitor performance with various reported fullerene-derived carbon materials.

| Materials                                    | CD    |       | CV    |        | Ref.      |
|----------------------------------------------|-------|-------|-------|--------|-----------|
|                                              | (F/g) | (A/g) | (F/g) | (mA/s) |           |
| C <sub>60</sub> nanosheet                    |       |       | 12.7  | 5      | 1         |
| MF C <sub>60</sub>                           | 141   | 0.5   |       |        | 2         |
| HT-FNT_2000(C <sub>60</sub> )                |       |       | 145   | 5      | 3         |
| HT-FNR_2000(C <sub>60</sub> )                |       |       | 132   | 5      | 3         |
| Fe-MFC <sub>60</sub> -150                    | 112.4 | 0.1   |       |        | 4         |
| FCL700 (C <sub>60</sub> )                    | 271   | 1     |       |        | 5         |
| MCFC-900 (C <sub>70</sub> )                  | 205   | 1     | 286   | 5      | 6         |
| HTFT_2000(C <sub>70</sub> )                  |       |       | 212   | 5      | 6         |
| HTFT_900(C <sub>70</sub> )                   |       |       | 26.4  | 5      | 7         |
| C <sub>60</sub> FcC <sub>60</sub> -8IPA_900  | 129   | 1     | 102.5 | 10     | this work |
| C <sub>60</sub> FcC <sub>60</sub> -8IPA_900* | 261   | 1     | 236   | 10     | this work |

\*Through further activation treatment, we can get better performance C<sub>60</sub>FcC<sub>60</sub>-8IPA\_900.

Under similar conditions, the same current density or the same cycle speed, C<sub>60</sub>FcC<sub>60</sub>-8IPA\_900 exhibit a good electrochemical performance at a lower heat treatment temperature.

## References (in Table S4)

1. L. K. Shrestha, Y. Yamauchi, J. P. Hill, K. i. Miyazawa and K. Ariga, *J. Am. Chem. Soc.*, 2013, **135**, 586-589.
2. M. Benzigar, S. Joseph, H. Ilbeygi, D. H. Park, S. Sarkar, G. Chandra, S. Umopathy, S. Srinivasan, S. Talapaneni and A. Vinu, *Angew. Chem.Int.Edit.*, 2018, **57**, 569-573.
3. L. K. Shrestha, R. G. Shrestha, Y. Yamauchi, J. P. Hill, T. Nishimura, K. i. Miyazawa, T. Kawai, S. Okada, K. Wakabayashi and K. Ariga, *Angew. Chem.Int.Edit.*, 2015, **54**, 951-955.
4. M. R. Benzigar, S. Joseph, G. Saianand, A. I. Gopalan and A. Vinu, *Micropor. Mesopor. Mat.*, 2019, **285**, 21-31.
5. Z. Peng, Y. Hu, J. Wang, S. Liu, C. Li, Q. Jiang, J. Lu, X. Zeng, P. Peng and F. F. Li, *Adv. Energy Mater.*, 2019, **9(11)**, 1802928.
6. P. Bairi, S. Maji, J. P. Hill, J. H. Kim, K. Ariga and L. K. Shrestha, *J. Mater. Chem. A.*, 2019, **7**, 12654-12660.
7. P. Bairi, R. G. Shrestha, J. P. Hill, T. Nishimura, K. Ariga and L. K. Shrestha, *J. Mater. Chem. A.*, 2016, **4**, 13899-13906.
